# Supplementary material
Source: PubMed Central journal article supplement (PMC61037)
Supplement: 1471-2288-1-11-s1.pdf [file 1471-2288-1-11-s1.pdf]

## Appendix 1: The Formulas

**For confounder adjustment in an unmatched design,** to extend the formulas in [1], page 305, from one to  $F$  controls per case, we need only multiply the parameter  $\Sigma'$  in [1] by  $F$ .

We define  $\Sigma' = F[P R_E \sum_{i=1}^K p_{1i} R_{Ci} + (1 - P) \sum_{i=1}^K p_{2i} R_{Ci}]$ , and

$$V_A = (\sum 1/V_{iA})^{-1}, \quad V_{iA} = \frac{1}{P p_{1i}} + \frac{1}{(1 - P) p_{2i}} + \Sigma' \left[ \frac{1}{P p_{1i} R_{Ci} R_E} + \frac{1}{(1 - P) p_{2i} R_{Ci}} \right],$$

$$V_N = (\sum 1/V_{iN})^{-1}, \quad V_{iN} = T_i^3 / W_{1i} W_{2i} W_{3i} W_{4i}$$

(we divide out the factor  $n$  shown in [1]), where the proportion in confounder level  $i$

$$\text{for a control is } W_{1i} = P p_{1i} + (1 - P) p_{2i},$$

$$\text{for a case is } W_{2i} = [P p_{1i} R_E + (1 - P) p_{2i}] R_{Ci} / \Sigma',$$

$$\text{and exposed is } W_{3i} = P p_{1i} (1 + R_{Ci} R_E / \Sigma'),$$

$$\text{and unexposed is } W_{4i} = (1 - P) p_{2i} (1 + R_{Ci} / \Sigma'); \text{ and}$$

$$T_i = W_{1i} + W_{2i} = W_{3i} + W_{4i}.$$

To compute the sample size, we invert formula (7.15) of [1], to obtain the one-sided ( $S = 1$ ) solution

$$n = [(z_\alpha \sqrt{V_N} + z_{1-\beta} \sqrt{V_A}) / \log(R_E)]^2, \quad (1)$$

and the control sample size is the first integer greater than  $n$ . The case sample size is the first integer greater than  $n/F$ . The terms  $z_\alpha$  and  $z_{1-\beta}$  are the usual Standard Normal deviates. We replace  $z_\alpha$  with  $z_{\alpha/2}$  for the two-sided solution (when  $S = 2$ ). Four common values of  $\alpha$  and two values of  $\beta$  are supplied by the program.

**The unadjusted formulas** are shown on page 305 of [1], but it is easy to show that these are the same as the results obtained when we specify  $K = 1$  in the preceding formulas. Note that  $p_{11} = 1$  and  $p_{21} = 1$  in that case. In the computer program, therefore, we use the same lines of computation for the adjusted and unadjusted results.

**For confounder adjustment in a strata-matched design,** The definition of  $\Sigma'$  is the same as above. The other items are re-defined as follows:

$$V_{iA} = \Sigma' \left\{ \left[ \frac{1}{P p_{1i}} + \frac{1}{(1 - P) p_{2i}} \right] \frac{[P p_{1i} + (1 - P) p_{2i}]}{[P p_{1i} R_E + (1 - P) p_{2i}] R_{Ci} F} + \frac{1}{P p_{1i} R_{Ci} R_E} + \frac{1}{(1 - P) p_{2i} R_{Ci}} \right\},$$

$$V_{iN} = T_i^3 / W_{1i} W_{2i} W_{3i} W_{4i} = (1 + F)^3 W_{2i} / F W_{3i} W_{4i}, \text{ with}$$

$$W_{1i} = F W_{2i},$$

$$\begin{aligned}
W_{2i} &= [Pp_{1i}R_E + (1 - P)p_{2i}]R_{Ci}/\Sigma' , \text{ as before,} \\
W_{3i} &= Pp_{1i}R_{Ci}R_E/\Sigma' + FW_{2i}Pp_{1i}/[Pp_{1i} + (1 - P)p_{2i}] , \\
W_{4i} &= (1 - P)p_{2i}R_{Ci}/\Sigma' + FW_{2i}(1 - P)p_{2i}/(Pp_{1i} + (1 - P)p_{2i}) , \\
\text{and } T_i &= W_{1i} + W_{2i} = (1 + F)W_{2i} = W_{3i} + W_{4i} .
\end{aligned}$$

Again, we use  $V_A = (\sum 1/V_{iA})^{-1}$  and  $V_N = (\sum 1/V_{iN})^{-1}$ , which are the approximations due to Woolf [2].

To compute the sample size, we again use formula (1).

## References

- [1] NE Breslow, NE Day: *Statistical Methods in Cancer Research, Vol. 2: The Design and Analysis of Cohort Studies*, IARC Scientific Publications No. 82, International Agency of Research on Cancer, Lyon, France, 1987, Sections 7.8-7.9, 305-306.
- [2] B Woolf: **On estimating the relationship between blood group and disease.** *Annals of Human Genetics*, 1955 **19**, pp. 251-253.
